# Supplementary material for: Carotenoid Profiling of Yellow-Flesh Peach Fruit
Source: MDPI journal article supplement (doi:10.3390/foods11121669), 2022-06-07
Supplement: s1 [file s1]

## Supplementary Tables

**Table S1** Descriptors of yellow-flesh peach

| Peach varieties | Fruit development | Surface    | Flesh | Peach varieties | Fruit development | Surface    | Flesh | Peach varieties name | Fruit development | Surface    | Flesh |
|-----------------|-------------------|------------|-------|-----------------|-------------------|------------|-------|----------------------|-------------------|------------|-------|
| name            | period (d)        | indumentum | color | name            | period (d)        | indumentum | color |                      | period (d)        | indumentum | color |
| Chaowuyuehuo    | 63                | GS         | Y     | Huyou003        | 97                | PS         | G     | Xiyanghuangrou       | 120               | GS         | G     |
| Springbaby      | 63                | PS         | Y     | Zaohuangpantao  | 97                | GS         | G     | Shasita              | 121               | GS         | O     |
| Zaofengtian     | 63                | PS         | Y     | Tubade          | 98                | GS         | G     | Chunguan             | 122               | GS         | G     |
| Shuguang        | 68                | PS         | Y     | Honggang        | 101               | GS         | O     | Taiyangnianhe        | 122               | GS         | G     |
| Wuyuehuo        | 70                | PS         | Y     | FlavorGold      | 102               | GS         | Y     | Zaoliguangtao        | 122               | PS         | Y     |
| Jinshanzaohong  | 74                | PS         | Y     | TX4F244C        | 102               | GS         | O     | Guantao14            | 124               | GS         | O     |
| Zaohongbaoshi   | 79                | PS         | Y     | Hongding        | 102               | GS         | Y     | Ruiguang20           | 124               | PS         | O     |
| Armking         | 80                | PS         | O     | Pegaso          | 103               | PS         | G     | Huanxiang            | 125               | PS         | G     |
| Zijinhong1      | 80                | PS         | Y     | Sunblaze        | 103               | PS         | G     | Buleidingfeng        | 126               | GS         | Y     |
| Quetta          | 81                | PS         | Y     | Hagen           | 103               | GS         | G     | Dikesong             | 126               | GS         | G     |
| Jinhualu        | 81                | GS         | G     | Dazhaohuangtao  | 104               | GS         | G     | Veteran              | 127               | GS         | O     |
| Ruiguang2       | 81                | PS         | Y     | Kalinal         | 104               | GS         | O     | 85-22-35             | 128               | GS         | G     |
| 63-15-32        | 83                | GS         | Y     | Weisuweiao      | 105               | GS         | Y     | Huangroupantao       | 128               | GS         | G     |
| 63-15-75        | 83                | GS         | G     | Hongyoutao4     | 106               | PS         | Y     | Jinyan               | 128               | GS         | O     |
| Crimsonbaby     | 83                | PS         | Y     | Mingxing        | 106               | GS         | O     | Jintong7             | 129               | GS         | O     |
| 85-13-24        | 85                | GS         | G     | Shuangfo        | 106               | PS         | Y     | Ligelante            | 129               | PS         | Y     |
| Shuangxihong    | 85                | PS         | Y     | Guantao5        | 107               | GS         | O     | 77-18-1              | 131               | GS         | O     |
| Flordaking      | 86                | GS         | Y     | NJN78           | 108               | PS         | G     | Dahuaaibaotai        | 131               | GS         | G     |
| TX2B7N          | 86                | PS         | Y     | Jinhui          | 108               | GS         | G     | 61-299               | 133               | GS         | O     |
| NJN70           | 87                | PS         | G     | Nectaross       | 109               | PS         | G     | Feilipu              | 133               | GS         | O     |

|                |    |    |   |                |     |    |   |                 |     |    |   |
|----------------|----|----|---|----------------|-----|----|---|-----------------|-----|----|---|
| NJN76          | 87 | PS | G | Duli           | 109 | PS | Y | 63-3-9          | 134 | GS | G |
| Sunsplash      | 87 | PS | G | 5-24-18        | 110 | GS | G | Flameprince     | 134 | GS | Y |
| Kaixuan        | 88 | GS | G | Resino         | 110 | GS | G | Jinfeng         | 135 | GS | G |
| TX2C104N       | 89 | PS | Y | Zhejin3        | 110 | GS | G | Jinluoman       | 136 | GS | G |
| Changlihuangro |    |    |   |                |     |    |   |                 |     |    |   |
| u              | 89 | GS | G | Blazeprince    | 111 | GS | Y | Tianjinhuangrou | 136 | GS | G |
| Chengxiang     | 89 | GS | O | Jintong5       | 112 | GS | O | 63-9-26         | 137 | GS | G |
| Flordacrest    | 90 | GS | G | Lianhuang      | 112 | GS | O | Huangjintao     | 137 | GS | Y |
| NJN72          | 90 | PS | Y | SunKing        | 113 | PS | Y | 81-22-71        | 138 | GS | G |
| RedJune        | 90 | PS | G | StarkDelicious | 114 | PS | G | Deguohuangjin   | 138 | GS | G |
| Sunraycer      | 90 | PS | G | Huangjinmeili  | 114 | GS | O | Xiaohuaaibaotai | 138 | GS | G |
| Ao19           | 90 | PS | G | Kashenliguang  | 114 | PS | O | NF9260          | 139 | PS | G |
| jinmali        | 90 | GS | G | 77-20-5        | 115 | GS | O | Qiukui          | 140 | GS | G |
| Ruiguang22     | 90 | PS | Y | 77-26-7        | 115 | GS | O | 77-15-2         | 141 | GS | G |
| 801            | 91 | PS | G | Sungrand       | 115 | PS | G | 77-26-33        | 141 | GS | G |
| 85-13-19       | 91 | GS | G | Habulite       | 117 | GS | G | 78-19-40        | 142 | GS | G |
| 5-8-23         | 93 | GS | G | Luomianna      | 117 | GS | G | Huolianjindan   | 142 | GS | G |
| Tropicprince   | 94 | GS | O | 82-61-40       | 118 | GS | O | Jincheng        | 142 | GS | O |
| TX4C189LN      | 94 | PS | Y | Heyangyoutao   | 118 | PS | Y | Yangtao40       | 142 | GS | G |
| Fafulaite3     | 94 | GS | O | B7029          | 119 | GS | G | 78-19-16        | 143 | GS | G |
| Zaohong2       | 94 | PS | O | 81-14-63       | 120 | GS | O | 78-20-17        | 145 | GS | G |
| Jinxu          | 95 | GS | G | 81-20-16       | 120 | GS | G | Juhuang         | 145 | GS | O |
| Zijinhong2     | 95 | PS | G | Faye           | 120 | GS | G | Jintong8        | 146 | GS | O |
| Zaojinlu       | 96 | GS | G | Jintong6       | 120 | GS | O | Hafu            | 147 | GS | Y |
| Beibeile       | 97 | GS | O | Jinying        | 120 | GS | G | Shamenlaite     | 151 | GS | G |

Note: GS: glabrous skin; PS: pubescent skin; Y:yellow; G: golden; O: orange

**Table S2** Carotenoid content of yellow-flesh peach

| Peach varieties | Lutein | Zeaxanthin | $\beta$ -cryptoxanthin | $\alpha$ -carotene | $\beta$ -carotene | Total   | Peach varieties | Lutein | Zeaxanthin | $\beta$ -cryptoxanthin | $\alpha$ -carotene | $\beta$ -carotene | Total   |
|-----------------|--------|------------|------------------------|--------------------|-------------------|---------|-----------------|--------|------------|------------------------|--------------------|-------------------|---------|
| name            |        |            |                        |                    |                   | content | name            |        |            |                        |                    |                   | content |
| Chaowuyuehuo    | 0.27   | 1.15       | 0.34                   | 0.47               | 2.69              | 4.92    | Resino          | 0.21   | 1.72       | 0.37                   | 0.48               | 6.62              | 9.40    |
| Springbaby      | 0.27   | 2.10       | 0.39                   | 0.41               | 3.79              | 6.96    | Zhejin3         | 0.30   | 1.69       | 0.45                   | 0.15               | 5.22              | 7.81    |
| Zaofengtian     | 0.22   | 1.35       | 0.35                   | 0.15               | 2.71              | 4.78    | Blazeprince     | 0.17   | 0.24       | 0.15                   | 0.15               | 1.01              | 1.72    |
| Shuguang        | 0.34   | 1.97       | 0.43                   | 0.66               | 4.42              | 7.82    | Jintong5        | 0.26   | 1.91       | 0.45                   | 0.49               | 6.82              | 9.94    |
| Wuyuehuo        | 0.30   | 1.29       | 0.46                   | 0.48               | 4.98              | 7.51    | Lianhuang       | 0.22   | 1.72       | 0.41                   | 0.42               | 7.17              | 9.94    |
| Jinshanzaozhong | 0.40   | 2.61       | 0.49                   | 0.79               | 3.86              | 8.14    | SunKing         | 0.23   | 0.71       | 0.32                   | 0.16               | 2.57              | 3.99    |
| Zaohongbaoshi   | 0.43   | 3.54       | 0.50                   | 0.80               | 5.01              | 10.28   | StarkDelicious  | 0.23   | 1.04       | 0.37                   | 0.50               | 4.42              | 6.56    |
| Armking         | 0.33   | 1.25       | 0.46                   | 0.47               | 5.29              | 7.81    | Huangjinmeili   | 0.25   | 2.07       | 0.52                   | 0.64               | 9.70              | 13.20   |
| Zijinhong1      | 0.26   | 1.22       | 0.45                   | 0.16               | 3.72              | 5.81    | Kashenliguang   | 0.19   | 0.31       | 0.22                   | 0.14               | 1.71              | 2.57    |
| Quetta          | 0.20   | 3.46       | 0.44                   | 0.16               | 5.59              | 9.85    | 77-20-5         | 0.22   | 2.85       | 0.55                   | 0.40               | 13.93             | 17.93   |
| Jinhualu        | 0.24   | 1.33       | 0.51                   | 0.52               | 4.43              | 7.03    | 77-26-7         | 0.20   | 2.23       | 0.57                   | 0.48               | 16.04             | 19.52   |
| Ruiguang2       | 0.26   | 7.39       | 1.24                   | 0.65               | 7.11              | 16.64   | Sungrand        | 0.21   | 0.81       | 0.35                   | 0.15               | 4.59              | 6.11    |
| 63-15-32        | 0.17   | 2.43       | 0.53                   | 1.01               | 6.02              | 10.17   | Habulite        | 0.17   | 1.09       | 0.32                   | 0.14               | 3.98              | 5.70    |
| 63-15-75        | 0.24   | 2.67       | 0.46                   | 0.66               | 4.01              | 8.04    | Luomianna       | 0.26   | 2.08       | 0.52                   | 0.58               | 5.93              | 9.37    |
| Crimsonbaby     | 0.25   | 1.30       | 0.35                   | 0.43               | 3.82              | 6.15    | 82-61-40        | 0.23   | 1.91       | 0.41                   | 0.69               | 10.06             | 13.31   |
| 85-13-24        | 0.26   | 2.89       | 0.69                   | 0.55               | 4.40              | 8.81    | Heyangyoutao    | 0.24   | 0.74       | 0.42                   | 0.16               | 5.16              | 6.73    |
| Shuangxihong    | 0.24   | 0.52       | 0.61                   | 1.16               | 3.96              | 6.49    | B7029           | 0.46   | 0.15       | 0.28                   | 0.15               | 0.93              | 1.97    |
| Flordaking      | 0.28   | 0.71       | 0.40                   | 0.63               | 6.66              | 8.67    | 81-14-63        | 0.26   | 1.10       | 0.44                   | 0.56               | 7.73              | 10.10   |
| TX2B7N          | 0.25   | 1.11       | 0.38                   | 0.43               | 4.44              | 6.62    | 81-20-16        | 0.25   | 1.03       | 0.35                   | 0.57               | 5.48              | 7.69    |
| NJN70           | 0.24   | 2.86       | 0.43                   | 0.30               | 5.41              | 9.23    | Faye            | 0.24   | 1.22       | 0.36                   | 0.55               | 5.11              | 7.48    |
| NJN76           | 0.26   | 4.56       | 2.95                   | 0.15               | 4.01              | 11.93   | Jintong6        | 0.26   | 3.35       | 0.75                   | 0.54               | 8.74              | 13.63   |
| Sunsplash       | 0.31   | 2.71       | 0.55                   | 0.54               | 6.84              | 10.94   | Jinying         | 0.27   | 0.82       | 0.32                   | 0.51               | 4.33              | 6.25    |
| Kaixuan         | 0.24   | 2.27       | 0.57                   | 0.40               | 12.37             | 15.85   | Xiyanghuangro   | 0.21   | 0.81       | 0.31                   | 0.34               | 4.68              | 6.35    |

|                |      |      |      |      |      |       |               |      |      |      |      |       |       |
|----------------|------|------|------|------|------|-------|---------------|------|------|------|------|-------|-------|
| u              |      |      |      |      |      |       |               |      |      |      |      |       |       |
| TX2C104N       | 0.23 | 2.26 | 0.43 | 0.15 | 5.46 | 8.53  | Shasita       | 0.22 | 1.91 | 0.35 | 0.53 | 11.02 | 14.02 |
| Changlihuangro | 0.23 | 2.57 | 0.55 | 0.34 | 7.12 | 10.80 |               | 0.27 | 2.54 | 0.37 | 0.43 | 5.34  | 8.96  |
| u              |      |      |      |      |      |       |               |      |      |      |      |       |       |
| Chunguan       |      |      |      |      |      |       |               |      |      |      |      |       |       |
| Chengxiang     | 0.23 | 3.22 | 0.46 | 0.15 | 4.57 | 8.63  | Taiyangnianhe | 0.22 | 1.43 | 0.39 | 0.47 | 8.52  | 11.03 |
| Flordacrest    | 0.23 | 0.88 | 0.37 | 0.39 | 3.56 | 5.44  | Zaoliguangtao | 0.24 | 0.50 | 0.34 | 0.16 | 4.84  | 6.07  |
| NJN72          | 0.28 | 0.22 | 0.15 | 0.35 | 2.00 | 2.99  | Guantao14     | 0.27 | 1.48 | 0.35 | 0.42 | 9.81  | 12.34 |
| RedJune        | 0.23 | 2.31 | 0.40 | 0.15 | 3.99 | 7.08  | Ruiguang20    | 0.22 | 1.43 | 0.74 | 0.65 | 7.47  | 10.51 |
| Sunraycer      | 0.26 | 2.14 | 0.46 | 0.16 | 4.35 | 7.37  | Huanxiang     | 0.25 | 1.65 | 0.44 | 0.37 | 5.96  | 8.67  |
| Ao19           | 0.21 | 1.28 | 0.43 | 0.15 | 3.47 | 5.54  | Buleidingfeng | 0.25 | 0.36 | 0.16 | 0.16 | 1.80  | 2.74  |
| jinmali        | 0.29 | 3.39 | 0.39 | 0.35 | 3.61 | 8.03  | Dikesong      | 0.27 | 2.51 | 0.39 | 0.39 | 11.36 | 14.92 |
| Ruiguang22     | 0.25 | 3.36 | 0.69 | 0.72 | 8.49 | 13.51 | Veteran       | 0.23 | 2.36 | 0.45 | 0.41 | 9.84  | 13.28 |
| 801            | 0.23 | 4.97 | 1.08 | 0.48 | 5.94 | 12.69 | 85-22-35      | 0.24 | 1.28 | 0.53 | 0.43 | 6.67  | 9.15  |
|                | 0.32 | 3.89 | 1.08 | 0.15 | 7.07 | 12.50 | Huangroupanta | 0.38 | 0.57 | 0.48 | 0.74 | 6.40  | 8.57  |
| 85-13-19       |      |      |      |      |      |       |               |      |      |      |      |       |       |
| o              |      |      |      |      |      |       |               |      |      |      |      |       |       |
| 5-8-23         | 0.30 | 5.32 | 0.66 | 0.38 | 6.36 | 13.02 | Jinyan        | 0.22 | 1.35 | 0.43 | 0.33 | 6.44  | 8.76  |
| Tropicprince   | 0.21 | 1.29 | 0.36 | 0.45 | 4.58 | 6.89  | Jintong7      | 0.26 | 1.89 | 0.64 | 0.78 | 16.71 | 20.27 |
| TX4C189LN      | 0.27 | 2.14 | 0.53 | 0.92 | 5.69 | 9.56  | Ligelante     | 0.20 | 0.32 | 0.15 | 0.15 | 2.45  | 3.27  |
| Fafulaite3     | 0.29 | 2.58 | 0.47 | 0.75 | 6.83 | 10.90 | 77-18-1       | 0.30 | 0.94 | 0.37 | 0.55 | 10.04 | 12.21 |
| Zaohong2       | 0.27 | 1.82 | 0.42 | 0.32 | 4.72 | 7.55  | Dahuaaibaotai | 0.20 | 0.60 | 0.30 | 0.35 | 3.79  | 5.24  |
| Jinxu          | 0.27 | 2.44 | 0.47 | 0.70 | 7.45 | 11.33 | 61-299        | 0.24 | 1.22 | 0.38 | 0.50 | 7.84  | 10.18 |
| Zijin hong2    | 0.23 | 2.73 | 0.40 | 0.69 | 4.07 | 8.12  | Feilipu       | 0.27 | 0.93 | 0.39 | 0.47 | 11.48 | 13.54 |
| Zaojinlu       | 0.27 | 3.70 | 0.42 | 0.14 | 3.81 | 8.34  | 63-3-9        | 0.30 | 1.36 | 0.37 | 0.41 | 6.00  | 8.44  |
| Beibeile       | 0.19 | 4.38 | 0.48 | 0.15 | 4.87 | 10.07 | Flameprince   | 0.20 | 0.66 | 0.34 | 0.43 | 4.13  | 5.77  |
| Huyou003       | 0.18 | 0.86 | 0.67 | 0.94 | 6.65 | 9.30  | Jinfeng       | 0.32 | 0.48 | 0.33 | 0.39 | 4.13  | 5.65  |
| Zaohuangpantao | 0.30 | 2.83 | 0.59 | 0.94 | 4.25 | 8.91  | Jinluoman     | 0.25 | 1.25 | 0.38 | 0.53 | 5.37  | 7.79  |

|                |      |      |      |      |       |       |                |      |      |      |      |       |       |
|----------------|------|------|------|------|-------|-------|----------------|------|------|------|------|-------|-------|
|                | 0.24 | 1.66 | 0.35 | 0.64 | 12.36 | 15.24 | Tianjinhuangro | 0.45 | 0.50 | 0.37 | 0.58 | 4.52  | 6.42  |
| Tubade         |      |      |      |      |       |       | u              |      |      |      |      |       |       |
| Honggang       | 0.20 | 2.18 | 0.38 | 0.42 | 4.93  | 8.11  | 63-9-26        | 0.24 | 0.77 | 0.33 | 0.43 | 5.74  | 7.52  |
| FlavorGold     | 0.24 | 2.18 | 0.81 | 0.50 | 3.25  | 6.98  | Huangjintao    | 0.38 | 0.45 | 0.40 | 0.48 | 4.30  | 6.00  |
| TX4F244C       | 0.31 | 2.72 | 2.41 | 0.31 | 7.81  | 13.57 | 81-22-71       | 0.22 | 1.10 | 0.43 | 0.55 | 7.45  | 9.75  |
| Hongding       | 0.22 | 0.34 | 0.39 | 0.38 | 4.43  | 5.76  | Deguohuangjin  | 0.28 | 0.62 | 0.36 | 0.44 | 4.06  | 5.74  |
|                | 0.21 | 1.79 | 0.45 | 0.19 | 3.84  | 6.47  | Xiaohuaaibaota | 0.32 | 0.48 | 0.29 | 0.15 | 3.51  | 4.74  |
| Pegaso         |      |      |      |      |       |       | i              |      |      |      |      |       |       |
| Sunblaze       | 0.32 | 1.15 | 0.43 | 0.52 | 3.88  | 6.30  | NF9260         | 0.36 | 1.23 | 0.43 | 0.42 | 6.59  | 9.03  |
| Hagen          | 0.23 | 2.12 | 0.43 | 0.52 | 6.31  | 9.61  | Qiukui         | 0.23 | 0.83 | 0.31 | 0.15 | 5.32  | 6.85  |
| Dazhaohuangtao | 0.30 | 1.13 | 0.56 | 1.75 | 6.14  | 9.87  | 77-15-2        | 0.34 | 0.68 | 0.35 | 0.16 | 4.12  | 5.66  |
| Kalinan        | 0.23 | 0.97 | 0.33 | 0.40 | 3.65  | 5.58  | 77-26-33       | 0.26 | 1.23 | 0.37 | 0.35 | 4.58  | 6.80  |
| Weisuweiao     | 0.26 | 1.07 | 0.35 | 0.47 | 4.89  | 7.03  | 78-19-40       | 0.44 | 0.65 | 0.34 | 0.18 | 3.92  | 5.53  |
| Hongyoutao4    | 0.25 | 0.62 | 0.36 | 0.42 | 5.83  | 7.47  | Huolianjindan  | 0.28 | 1.04 | 0.28 | 0.26 | 3.45  | 5.31  |
| Mingxing       | 0.25 | 2.22 | 0.47 | 0.15 | 6.37  | 9.46  | Jincheng       | 0.27 | 0.76 | 0.35 | 0.36 | 3.33  | 5.07  |
| Shuangfo       | 0.19 | 1.10 | 0.38 | 0.16 | 5.07  | 6.90  | Yangtao40      | 0.36 | 0.62 | 0.40 | 0.63 | 4.35  | 6.35  |
| Guantao5       | 0.29 | 2.43 | 0.49 | 0.45 | 10.69 | 14.35 | 78-19-16       | 0.34 | 1.17 | 0.44 | 0.65 | 5.03  | 7.63  |
| NJN78          | 0.23 | 1.30 | 0.41 | 0.14 | 6.04  | 8.12  | 78-20-17       | 0.36 | 0.59 | 0.35 | 0.15 | 4.13  | 5.57  |
| Jinhui         | 0.30 | 1.22 | 0.37 | 0.39 | 1.90  | 4.18  | Juhuang        | 0.25 | 1.80 | 0.44 | 0.49 | 10.36 | 13.34 |
| Nectaross      | 0.18 | 1.25 | 0.36 | 0.28 | 4.38  | 6.45  | Jintong8       | 0.28 | 1.11 | 0.37 | 0.68 | 6.31  | 8.74  |
| Duli           | 0.25 | 0.31 | 0.31 | 0.30 | 3.72  | 4.89  | Hafu           | 0.31 | 0.95 | 0.33 | 0.47 | 4.42  | 6.49  |
| 5-24-18        | 0.21 | 3.16 | 0.33 | 0.39 | 3.76  | 7.84  | Shamenlaite    | 0.22 | 1.79 | 0.32 | 0.42 | 2.66  | 5.40  |

Note: Data showed the mean of three replicates from samples at harvest in 2019. Carotenoid content's unit is  $\text{mg}\cdot\text{kg}^{-1}$  FW.
